# Supplementary material for: Time-Lapse Dynamics of the Mouse Oocyte Chromatin Organisation during Meiotic Resumption
Source: Biomed Res Int. 2014 Mar 30;2014:207357. doi: 10.1155/2014/207357 (PMC4016838; doi:10.1155/2014/207357)
Supplement: Supplementary file 1 — Additional files show the main events that happen throughout meiotic resumption (from 0 to 536 min) of mouse antral oocyte, both in developmentally competent (SN) or incompetent (NSN) oocytes. Time-lapse movies in bright field (Additional files 1 and 10) show changes in the nucleus, zona pellucida, perivitelline space and cytoplasm of the oocyte. Time-lapse movies under UV light (Additional files 2-9 and 11) show the changes that oocyte chromatin undergoes following GVBD and during the formation and segregation of chromosomes. [file 207357.f1.zip]

Archive with 11 entries (11 files):
- Additional file 1.mp4
- Additional file 10.mp4
- Additional file 11.mp4
- Additional file 2.mp4
- Additional file 3.mp4
- Additional file 4.mp4
- Additional file 5.mp4
- Additional file 6.mp4
- Additional file 7.mp4
- Additional file 8.mp4
- Additional file 9.mp4
